# Supplementary material for: An excellent full sodium-ion capacitor derived from a single Ti-based metal–organic framework
Source: Royal Society of Chemistry journal article supplement (doi:10.1039/c8ta09072f), 2018-01-01
Supplement: c8ta09072f1.pdf [file c8ta09072f1.pdf]

1 **An Excellent Full Sodium-Ion Capacitor Derived From a single**  
2 **Ti-based Metal-Organic Frameworks**

3  
4 Hao Chen, Chunlong Dai, Yanan Li, Renming Zhan, Minqiang Wang, Bingshu Guo, Youquan  
5 Zhang, Heng Liu, Maowen Xu\* and Shu-juan Bao\*

6  
7 Institute for Clean Energy & Advanced Materials, Faculty of Materials and Energy, Southwest  
8 University, Chongqing 400715, P.R. China.

9  
10 \* Corresponding authors.

11 *E-mail* addresses: xumaowen@swu.edu.cn (M. W. Xu), [baoshj@swu.edu.cn](mailto:baoshj@swu.edu.cn) (S. J. B).

## 1. Experimental Section

*Synthesis and characterization of  $TiO_xN_y$* :  $TiO_xN_y$  nanowires were obtained by annealing hydrogen titanate nanowires ( $H_2Ti_3O_7$ ) in ammonia flow at 800 °C.  $H_2Ti_3O_7$  NWs were firstly synthesized by hydrothermal method reported elsewhere.<sup>1</sup> Briefly,  $TiO_2$  anatase (2 g) was added into NaOH solution (30 mL, 15 M) under magnetic stirring for 1 h. Then, the suspension was transferred to a Teflon-lined stainless steel autoclave and heated in an electric oven at 180 °C for 72 h. After cooling down at room temperature, the product was stirred in 0.1 M HCl solution for 24 h. The material was filtered, washed with deionized water and alcohol, and dried at 70 °C for 12 h. Finally,  $H_2Ti_3O_7$  were converted to  $TiO_xN_y$  by annealing in  $NH_3$  flow at 800 °C for 4 h with a heating rate of 5 °C min<sup>-1</sup>.

## 2. Calculations of specific capacity, energy density and power density

The half-cell specific capacity (mAh g<sup>-1</sup>) is calculated by **Equation S1**;

$$(1) \quad Q = i \times t$$

$Q$  (mAh g<sup>-1</sup>) is the half-cell specific capacity;  $i$  (mA g<sup>-1</sup>) is the current density;  $t$  (h) is the charge or discharge time.

The Na-ion capacitors specific capacity (F g<sup>-1</sup>), energy density (E) and power density (P) are calculated based on **Equations S2, S3 and S4**;

$$(2) \quad C = I \times \Delta t / (\Delta V)$$

$$(3) \quad E = (C \times \Delta V^2) / 2$$

$$(4) \quad P = E / \Delta t$$

32  $C$  ( $F\ g^{-1}$ ) is the Na-ion Capacitors specific capacity;  $I$  ( $A\ g^{-1}$ ) is the current density;  $\Delta t$  (s) is the  
 33 discharge time.  $\Delta V$  is the charge-discharge potential window;  $E$  ( $Wh\ kg^{-1}$ ) is the energy density and  $P$   
 34 ( $W\ kg^{-1}$ ) is the power density.

### 35 **3. Calculate methods and details of capacitive effect contribution and diffusion-controlled** 36 **contribution**

37 Using the scan-rate-dependent CV curves (**Fig. 4A**) to quantify the contribution from capacitive  
 38 effects (both surface pseudocapacitance and doublelayer capacitance) and diffusion-controlled  $Na^+$   
 39 insertion process to the current response according to the following equation;

$$40 \quad I(V) = k_1 v + k_2 v^{1/2}$$

41 Where  $I$  ( $V$ ),  $k_1 v$  and  $k_2 v^{1/2}$  represent the total current response at a given potential  $V$ , current due to  
 42 surface capacitive effects, and current due to diffusion-controlled  $Na^+$  insertion process, respectively.

43 The above equation can also be reformulated as;

$$44 \quad I(V)/v^{1/2} = k_1 v^{1/2} + k_2$$

45 By plotting  $I(V)/v^{1/2}$  vs.  $v^{1/2}$  at different potentials, we can calculate the values of  $k_1$  (slope) and  $k_2$   
 46 (intercept) from the straight lines. This allows one to quantify the fraction of the current at specific  
 47 potentials to the capacitive effect ( $k_1 v$ ) and diffusion-controlled insertion ( $k_2 v^{1/2}$ ) at fixed potential (see  
 48 **Fig. S13 A, B**). After integration of the enclosed CV area, the amount of stored charge from different  
 49 energy storage modes can be distinguished, expressed by the following equation;

$$50 \quad Q = Q_s + Q_d$$

51 Where,  $Q$ ,  $Q_s$ , and  $Q_d$  represent the total stored charge included in the enclosed CV area at set scan  
 52 rate, surface capacitive effects, and diffusion controlled  $Na^+$  insertion process, respectively.

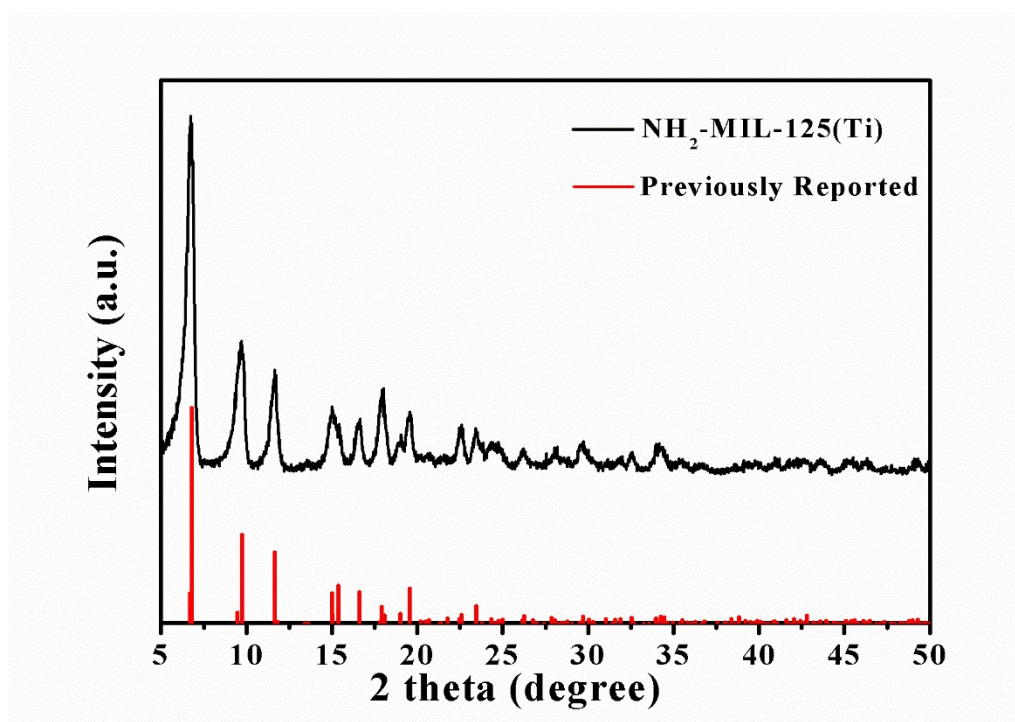

**Fig. S1.** XRD pattern of as-prepared  $\text{NH}_2\text{-MIL-125(Ti)}$ .

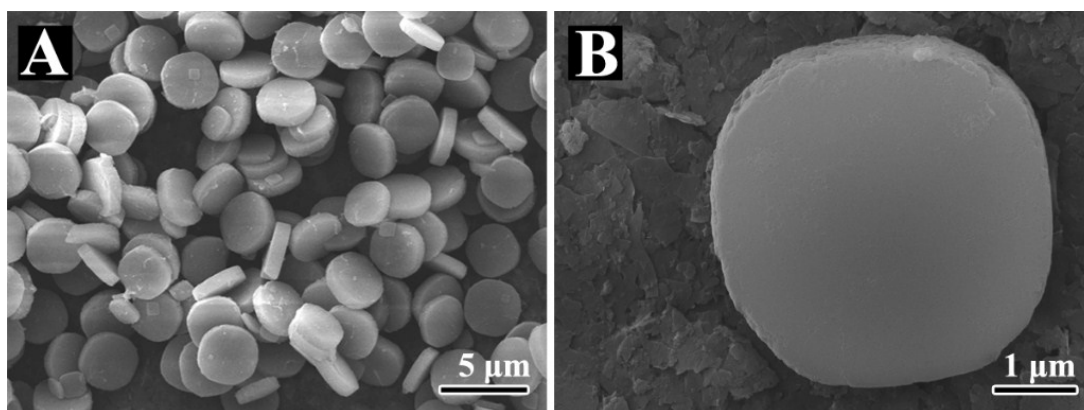

**Fig. S2.** (A and B) FESEM images of  $\text{NH}_2\text{-MIL-125(Ti)}$  with different resolution.

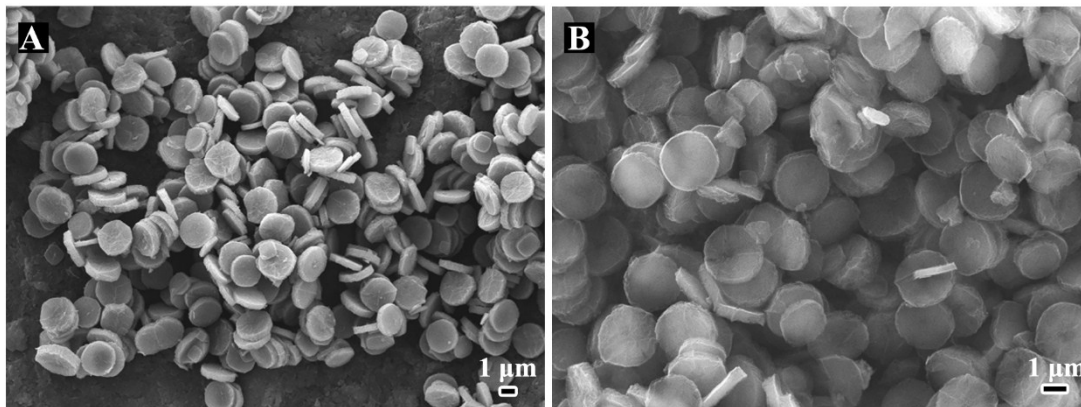

**Fig. S3.** (A and B) low resolution FESEM images of  $\text{TiO}_x\text{N}_y/\text{C}$  and NHPC, respectively.

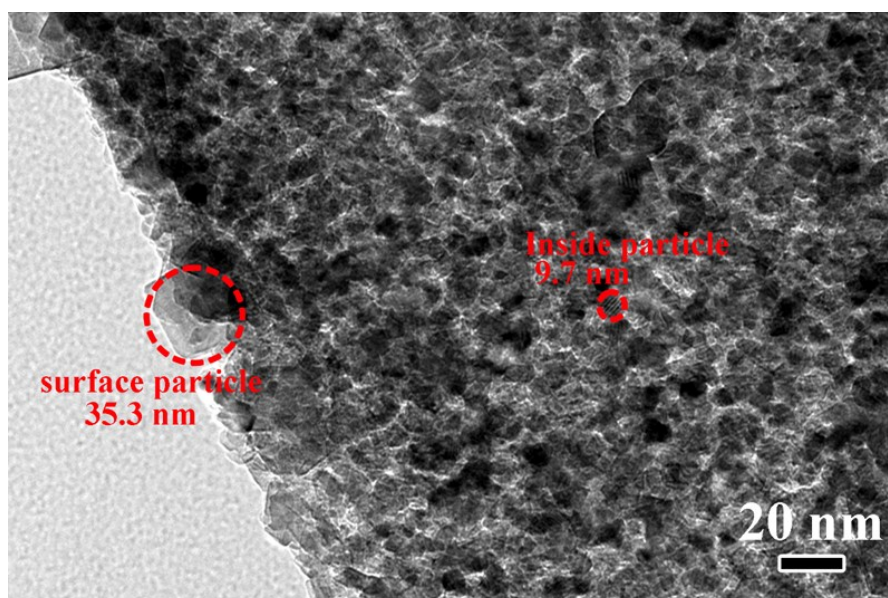

**Fig. S4.** bright-field TEM image of  $\text{TiO}_x\text{N}_y/\text{C}$  inside structure.

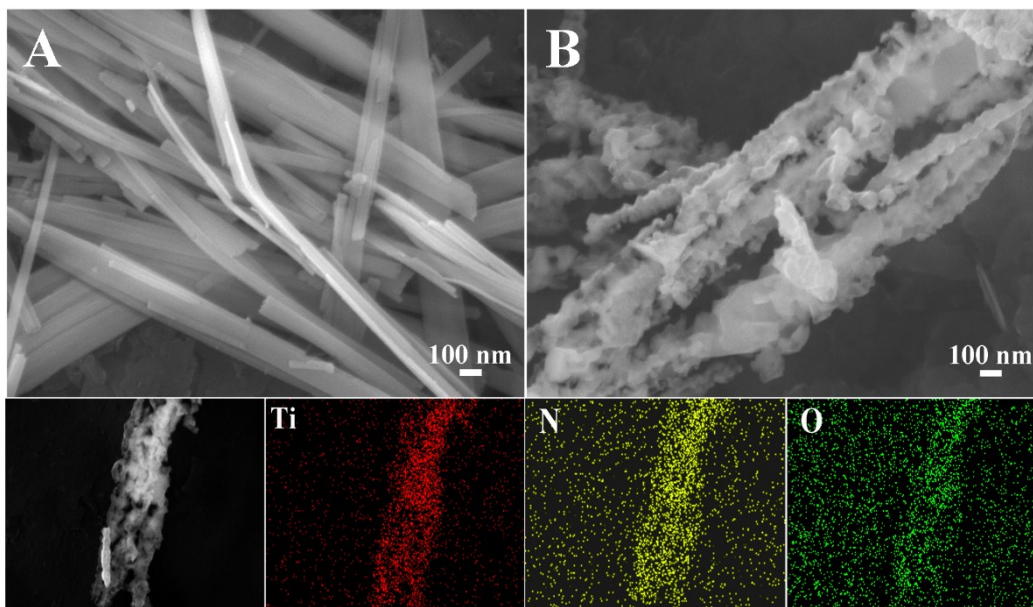

**Fig. S5.** (A) FESEM image of nanowires precursor, (B) FESEM image of  $\text{TiO}_x\text{N}_y$  nanowires and corresponding FESEM element mapping image.

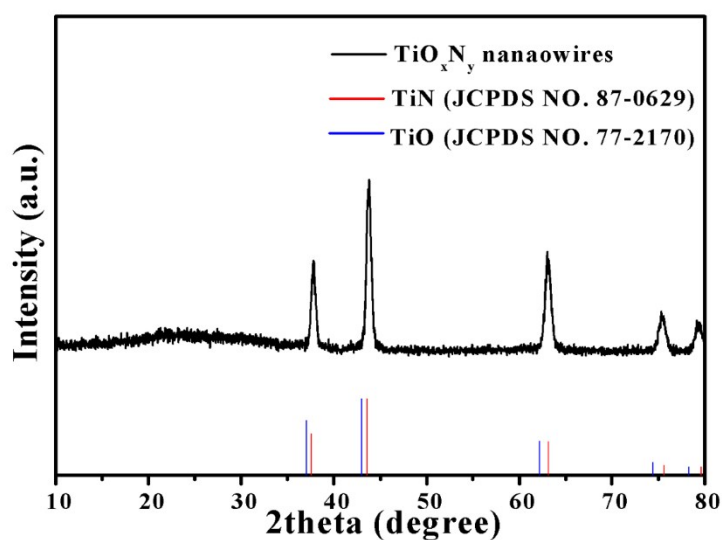

**Fig. S6.** XRD pattern of  $\text{TiO}_x\text{N}_y$  nanowires.



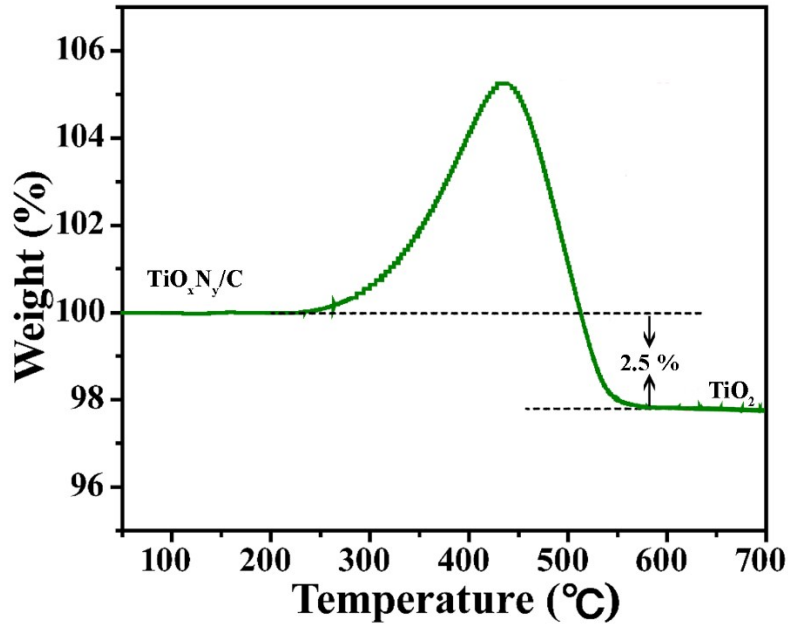

96

97 **Fig. S7.** Thermogravimetric analysis curves of  $\text{TiO}_x\text{N}_y/\text{C}$ .

98

99 The TGA data was obtained by annealing in  $\text{O}_2$  flow. In the detail, the original specimant is  
 100  $\text{TiO}_x\text{N}_y(x+y=1)$  and carbon. The specimant converted to pure  $\text{TiO}_2$  phase after TG test. So, according  
 101 to the the finnal mass of  $\text{TiO}_2$  and Invariance Principle of Ti elements in this process, the carbon  
 102 contents in the  $\text{TiO}_x\text{N}_y/\text{C}$  is approximately 22 % by calculated.

103

104

105

106

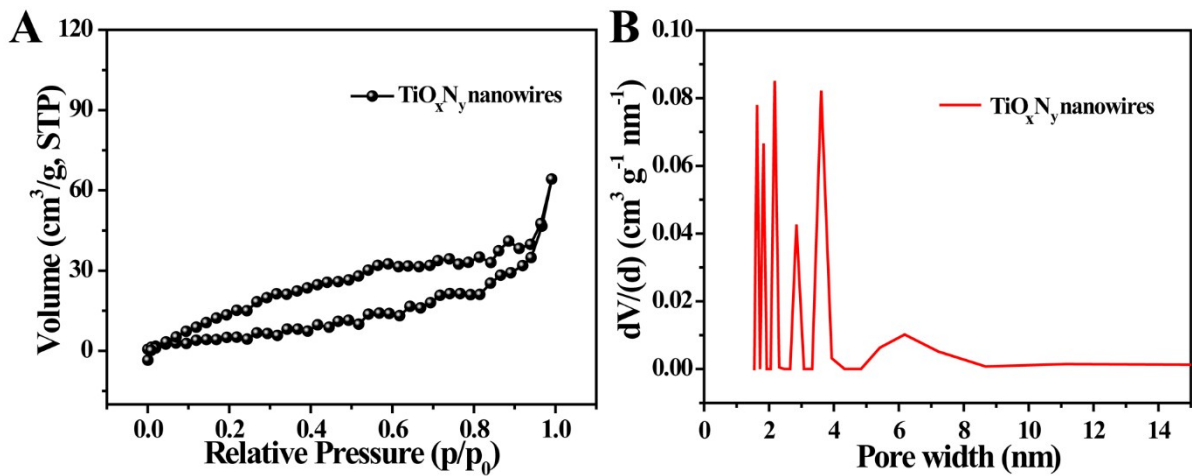

107

108 **Fig. S8.** (A) The nitrogen adsorption-desorption isotherms of  $\text{TiO}_x\text{N}_y$ , and (B) the corresponding pore  
 109 distribution.

110

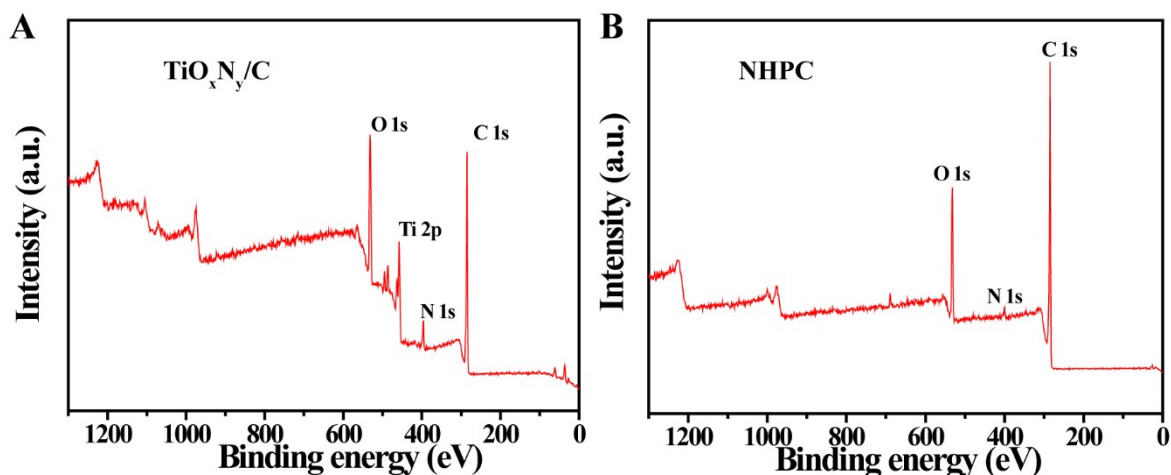

111

112

113 **Fig. S9.** (A and B) XPS spectra of  $\text{TiO}_x\text{N}_y/\text{C}$  and NHPC, respectively.

114

115

116

117

118

119

120

121

122

123

124

125

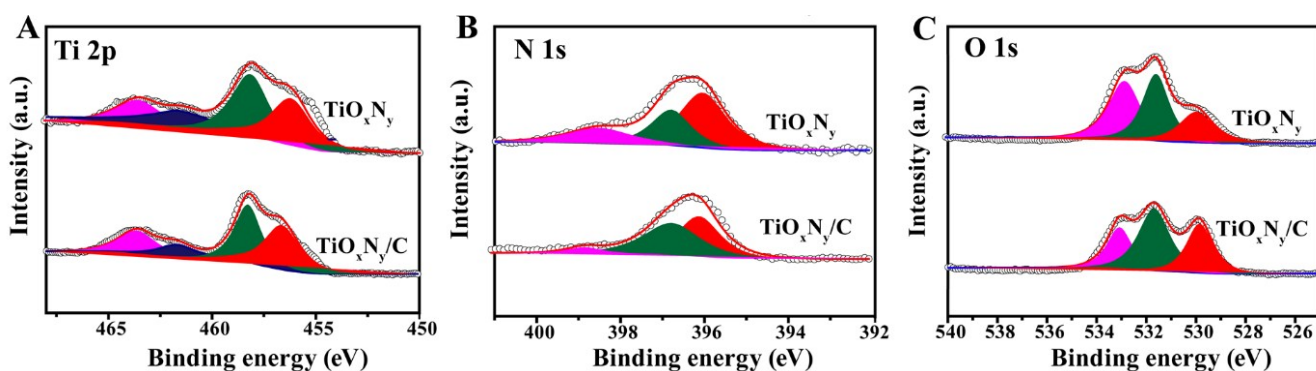

126

127 **Fig. S10.** (A, B and C) the contrast of Ti 2p, N 1s and O 1s XPS spectra between  $\text{TiO}_x\text{N}_y/\text{C}$  and  
128  $\text{TiO}_x\text{N}_y$  nanowires, respectively.

129

130

131

132

133



| Sample                            | Textural properties                                  |                                                     |
|-----------------------------------|------------------------------------------------------|-----------------------------------------------------|
|                                   | $S_{\text{BET}}^{\text{a}}(\text{m}^2\text{g}^{-1})$ | $V_{\text{t}}^{\text{b}}(\text{cm}^3\text{g}^{-1})$ |
| C                                 | 1731                                                 | 1.12                                                |
| $\text{TiO}_x\text{N}_y/\text{C}$ | 248                                                  | 0.5                                                 |
| $\text{TiO}_x\text{N}_y$          | 20.921                                               | 0.11                                                |

**Table S1.** the structure information of as-prepared samples.

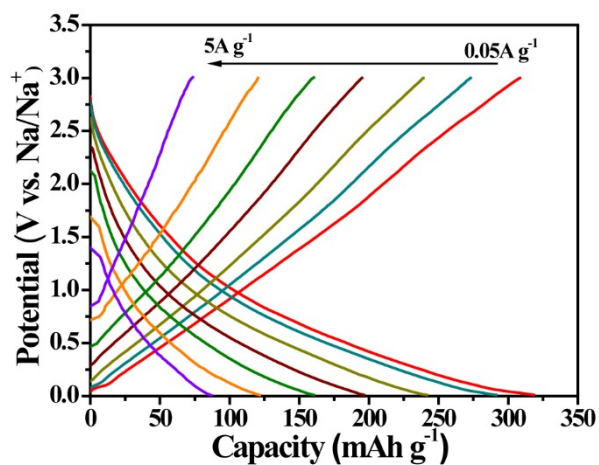

**Fig. S11.** Charge and discharge curves of  $\text{TiO}_x\text{N}_y/\text{C}$  at different current density.

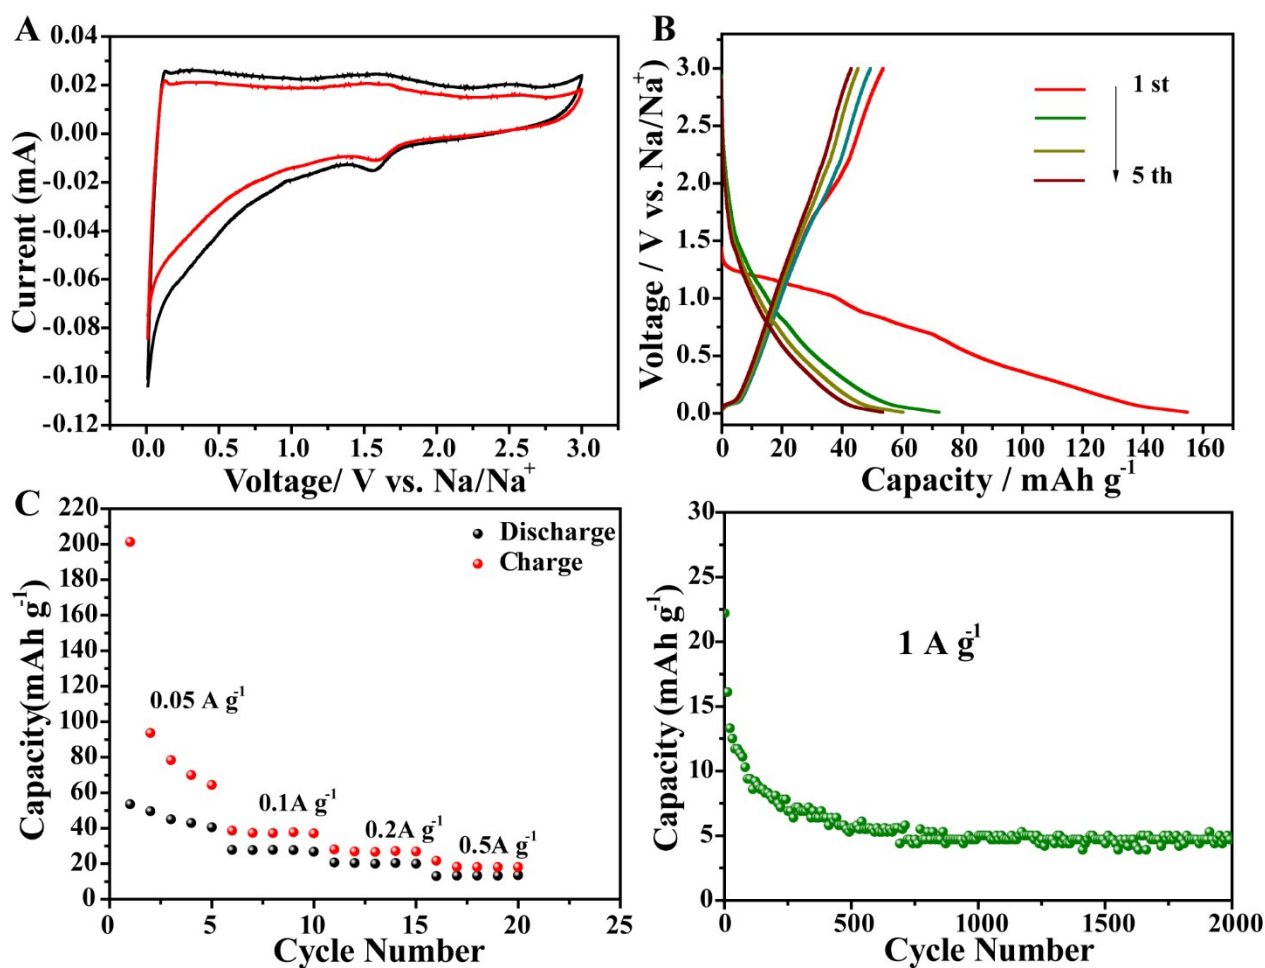

**Fig. S12.** CV curves (A), first five galvanostatic discharge–charge profiles at  $0.05 \text{ A g}^{-1}$  (B), rate performance (C) and the cycling stability of at  $1 \text{ A g}^{-1}$  of  $\text{TiO}_x\text{N}_y$  nanowires.

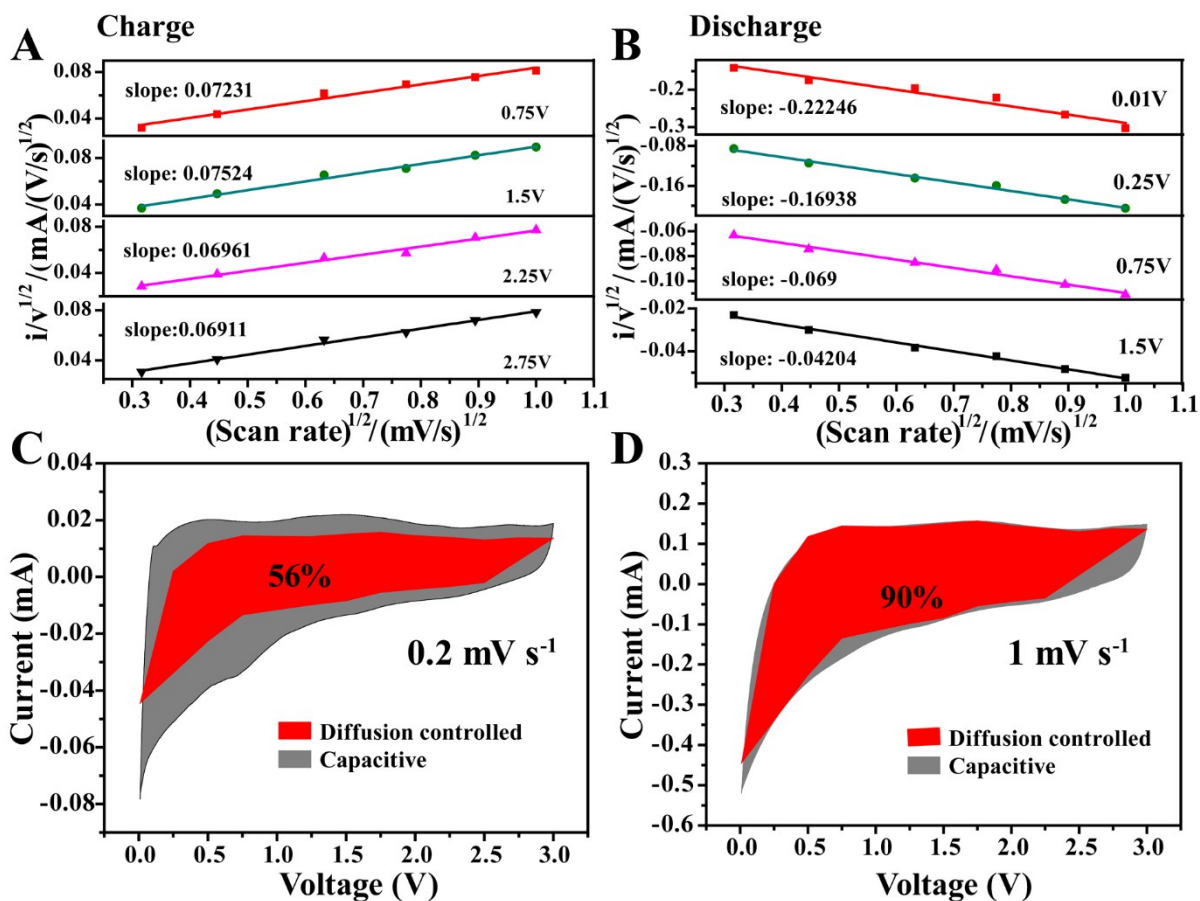

**Fig. S13.** (A and B)  $I/v^{1/2}$  vs.  $v^{1/2}$  plots of  $\text{TiO}_x\text{N}_y/\text{C}$  used for calculating constants  $k_1$  and  $k_2$  at different potentials, (C and D) Capacitive charge storage contributions at a scan rate of  $0.2 \text{ mV s}^{-1}$  and  $1 \text{ mV s}^{-1}$ .

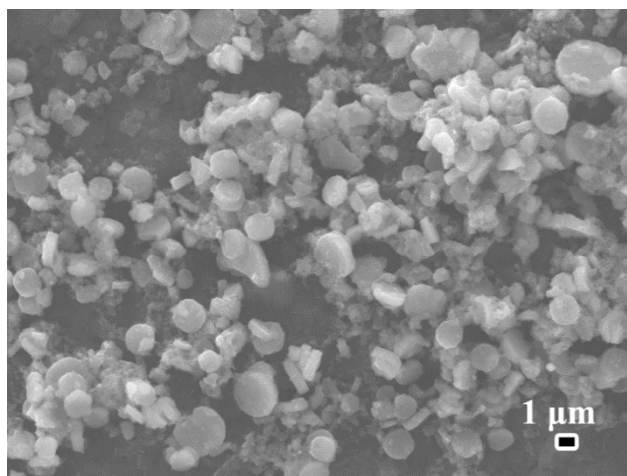

**Fig. S14.** FESEM images of  $\text{TiO}_x\text{N}_y/\text{C}$  after electrochemical cycles test.

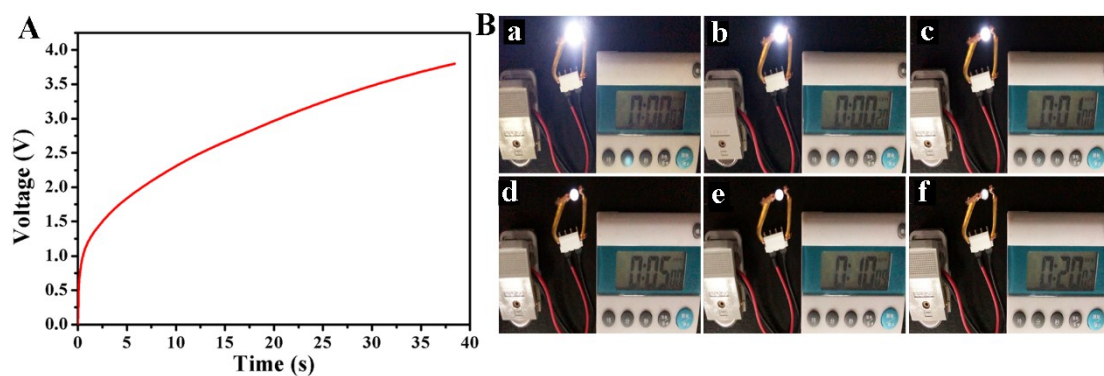

**Fig. S15.** The rapid charging curves in 40s of  $\text{TiO}_x\text{N}_y/\text{C} // \text{NHPC}$  SICs (B), and the Photographs of a light emitting diode powered by a rapid charging  $\text{TiO}_x\text{N}_y/\text{C} // \text{NHPC}$  SIC in 40 s under time recording by a timer.
